# Supplementary material for: Development and validation of a novel fluorescence method via sequential injection analysis to determine formaldehyde in drinking water
Source: Royal Society of Chemistry journal article supplement (doi:10.1039/c9ay00228f), 2019-01-01
Supplement: c9ay00228f1.pdf [file c9ay00228f1.pdf]

## SUPPLEMENTARY MATERIAL

Figure S1. Mean of calibration curves to quantify formaldehyde by proposed SIA method

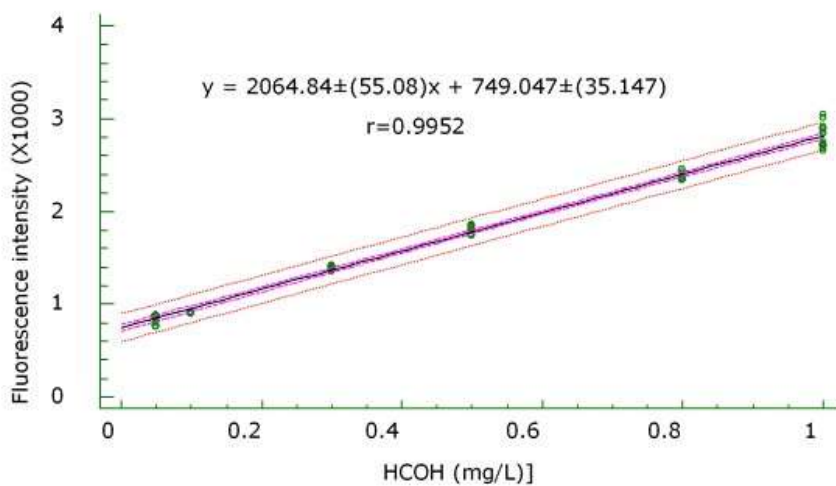

Table S1. Cook's distance study to verify homocedasticity of the data of the mean of calibration curves

| <i>Fila</i> | <i>Distancia de Cook</i> |
|-------------|--------------------------|
| 47          | 0.190815                 |
| 48          | 0.281808                 |
| 50          | 0.124959                 |
| 51          | 0.0845689                |

Table S2. Linear equation and error in each standard of formaldehyde for weighted regression line, no -weighted regression line and a non-parametric adjustment (Theil method) based on the residual graph.

| Adjustment              |                     |                     |                     |
|-------------------------|---------------------|---------------------|---------------------|
| Equation                |                     |                     |                     |
| Concentration<br>[mg/L] | No-weighted         | Weighted            | Theil               |
|                         | $y=2033.51x+731.64$ | $y=2036.84x+775.45$ | $y=2058.57x+703.14$ |
| 0.1                     | 97.05 %             | 75.38 %             | 109.71 %            |
| 0.5                     | 98.68 %             | 94.22 %             | 100.25 %            |
| 0.6                     | 93.20 %             | 89.46 %             | 94.37 %             |
| 0.8                     | 92.89 %             | 90.04 %             | 93.49 %             |

Table S3. Significance test for accuracy at different concentration of formaldehyde from calibration curve.  $H_0$ : there is no statistically significant difference between the experimental mean and the true value

| Concentration of formaldehyde<br>[mg/L] | $t_{\text{experimental}}$ | $t_{\text{critical}}$ | Decision     |
|-----------------------------------------|---------------------------|-----------------------|--------------|
| 0.1                                     | 0.61                      | 4.3                   | Accept $H_0$ |
| 0.5                                     | 1.94                      | 2.78                  | Accept $H_0$ |
| 0.6                                     | 12.10                     | 3.18                  | Reject $H_0$ |
| 0.8                                     | 11.58                     | 3.18                  | Reject $H_0$ |

Table S4. Reported values of the errors of the materials and instruments used in the built of calibration curves and the experimental values obtained

| Material or instrument         | Reported value | Distribution | Experimental value      |
|--------------------------------|----------------|--------------|-------------------------|
| Analytical balance             | 0.10 mg        | Rectangular  | $5.77 \times 10^{-5}$ g |
| Burette 25.0 mL                | 0.10 mL        | Triangular   | $4.08 \times 10^{-5}$ L |
| Pipette 4.0 mL                 | 0.01 mL        | Triangular   | $4.08 \times 10^{-6}$ L |
| Pipette 10.0 mL                | 0.02 mL        | Triangular   | $8.16 \times 10^{-6}$ L |
| Flask 5.0 mL                   | 0.02 mL        | Normal       | $0.02 \times 10^{-5}$ L |
| Flask 10.0 mL                  | 0.02 mL        | Normal       | $0.02 \times 10^{-5}$ L |
| Micropipette 10-100 $\mu$ L    | 0.56 %         | Triangular   | $2.26 \times 10^{-8}$ L |
| Micropipette 200 -1000 $\mu$ L | 0.03 %         | Triangular   | $2.45 \times 10^{-8}$ L |

### Procedure to determine uncertainty

$$\frac{u_{C_{HCOH}}}{C_{HCOH}} = \sqrt{\left(\frac{u_{C_{HCl}}}{C_{HCl}}\right)^2 + \left(\frac{u_{V_{gastado\ HCl}}}{V_{gastado\ HCl}}\right)^2 + \left(\frac{u_{PM_{HCOH}}}{PM_{HCOH}}\right)^2 + \left(\frac{u_{V_{alícuota\ HCOH}}}{V_{alícuota\ HCOH}}\right)^2} \quad (1)$$

Uncertainty of the stock solution of formaldehyde

$$\frac{u_{C_{HCOH}}}{C_{HCOH}} = \sqrt{\left(\frac{u_{C_{HCl}}}{C_{HCl}}\right)^2 + \left(\frac{u_{V_{gastado\ HCl}}}{V_{gastado\ HCl}}\right)^2 + \left(\frac{u_{PM_{HCOH}}}{PM_{HCOH}}\right)^2 + \left(\frac{u_{V_{alícuota\ HCOH}}}{V_{alícuota\ HCOH}}\right)^2}$$

- $u_{C_{HCl}}$

$$C_{HCl} = \frac{C_{NaOH} V_{gastado\ NaOH}}{V_{alícuota\ HCl}} \quad \frac{u_{C_{HCl}}}{C_{HCl}} = \sqrt{\left(\frac{u_{C_{NaOH}}}{C_{NaOH}}\right)^2 + \left(\frac{u_{V_{gastado\ NaOH}}}{V_{gastado\ NaOH}}\right)^2 + \left(\frac{u_{V_{alícuota\ HCl}}}{V_{alícuota\ HCl}}\right)^2}$$

$$C_{NaOH} = \frac{m_{BFK}}{PM_{BFK} V_{gastado\ NaOH}} \quad \frac{u_{C_{NaOH}}}{C_{NaOH}} = \sqrt{\left(\frac{u_{m_{BFK}}}{m_{BFK}}\right)^2 + \left(\frac{u_{PM_{BFK}}}{PM_{BFK}}\right)^2 + \left(\frac{u_{V_{gastado\ NaOH}}}{V_{gastado\ NaOH}}\right)^2}$$

$$u_{m_{BFK}} = \frac{1 \times 10^{-4}}{\sqrt{3}}$$

$$u_{PM_{BFK}} = \sqrt{(8u_C)^2 + (5u_H)^2 + (4u_O)^2 + (u_K)^2}$$

$$u_{V_{gastado\ NaOH}} = \frac{1 \times 10^{-4}}{\sqrt{6}}$$

- $u_{V_{gastado\ HCl}}$

$$u_{V_{\text{gastado HCl}}} = \frac{1 \times 10^{-4}}{\sqrt{6}}$$

- $u_{PM_{HCOH}}$

$$u_{PM_{HCOH}} = \sqrt{(u_C)^2 + (2u_H)^2 + (u_O)^2}$$

- $u_{V_{\text{alícuota HCOH}}}$

$$u_{V_{\text{alícuota HCOH}}} = \frac{1 \times 10^{-5}}{\sqrt{6}}$$

Table S5. Significance test of the recovery values for different kind of analyzed water.  
 $t_{critical} = 4.30$

| Sample          | $t_{critical}$          |                          |
|-----------------|-------------------------|--------------------------|
|                 | Level low<br>(0.2 mg/L) | Level high<br>(0.8 mg/L) |
| Bottled water 1 | 3.92                    | 2.88                     |
| Bottled water 2 | 0.77                    | 0.08                     |
| Bottled water 3 | 2.41                    | 1.23                     |
| Tap water 1     | 3.40                    | 0.24                     |
| Tap water 2     | 0.13                    | 1.06                     |
| Tap water 3     | 0.48                    | 0.44                     |

Table S6. Significance test from bias in water samples to demonstrated of truthfulness of the SIA method.  $t_{critical} = 4.30$

| Sample          | Level low<br>(0.2 mg/L) |           | Level high<br>(0.8 mg/L) |           |
|-----------------|-------------------------|-----------|--------------------------|-----------|
|                 | bias                    | $T_{exp}$ | bias                     | $T_{exp}$ |
| Bottled water 1 | 0.0537                  | 3.92      | 0.0215                   | 0.54      |
| Bottled water 2 | 0.0320                  | 0.77      | -0.1945                  | 2.10      |
| Bottled water 3 | -0.0223                 | 2.41      | -0.0405                  | 1.23      |
| Tap water 1     | -0.0253                 | 3.41      | 0.0158                   | 0.24      |
| Tap water 2     | -0.1035                 | 3.70      | -0.0930                  | 1.06      |
| Tap water 3     | 0.0102                  | 0.48      | -0.0273                  | 0.44      |
